# Supplementary material for: The Expression of Active CD11b Monocytes in Blood and Disease Progression in Amyotrophic Lateral Sclerosis
Source: MDPI journal article supplement (doi:10.3390/ijms23063370), 2022-03-21
Supplement: s1 [file s1]

| Baseline            | Age                       | ALSFRS-R                | Survival<br>V1            | Survival<br>onset       | ΔFRS                     | ALSFRS-R<br>change      |
|---------------------|---------------------------|-------------------------|---------------------------|-------------------------|--------------------------|-------------------------|
| HLA-DR+             | *P= 0.0170<br>R= 0.3850   | P= 0.9598<br>R= 0.0084  | **P= 0.0038<br>R= -0.4588 | P= 0.5733<br>R= -0.0943 | P= 0.1883<br>R= 0.2181   | P= 0.8738<br>R= -0.0266 |
| CD11b+NCM           | *P=0.0100<br>R=0.4128     | P= 0.6016<br>R= -0.0874 | **P= 0.0086<br>R= -0.4203 | P= 0.9140<br>R= 0.01812 | P= 0.0065<br>R= 0.4342   | *P= 0.0180<br>R= 0.3819 |
| CD11b+IM            | ***P=0.0003<br>R=0.5593   | P= 0.5060<br>R= 0.1113  | *P= 0.0260<br>R= -0.3609  | P= 0.9289<br>R= 0.0149  | P= 0.8500<br>R= -0.03173 | P= 0.7618<br>R= 0.0508  |
| Active<br>CD11b+NCM | **P= 0.0015<br>R= -0.4964 | P= 0.8664<br>R= 0.0282  | *P= 0.0166<br>R= 0.3862   | P= 0.9721<br>R= -0.0058 | P= 0.5722<br>R= -0.0945  | P= 0.8396<br>R= -0.0339 |
| Active<br>CD11b+IM  | P= 0.7513<br>R= 0.0531    | P= 0.8580<br>R= 0.0300  | P= 0.7333<br>R= -0.0571   | P= 0.5316<br>R= -0.1047 | P= 0.8802<br>R= 0.0253   | P= 0.1607<br>R= 0.2322  |
| Active<br>CD11b+CM  | P= 0.7581<br>R= -0.0516   | P= 0.4518<br>R= -0.1258 | P= 0.8300<br>R= 0.0360    | P= 0.5698<br>R= -0.0951 | P= 0.3945<br>R= 0.1422   | P= 0.0571<br>R= 0.3114  |

**Table S1. Pairwise correlation analysis of associations between monocyte subsets expression at baseline and age at V1 and clinical variables of disease progression.**

Significant associations are highlighted in grey. Log-transformed monocyte frequencies are used for analysis.
