# Supplementary material for: The Expression of Active CD11b Monocytes in Blood and Disease Progression in Amyotrophic Lateral Sclerosis
Source: MDPI journal article supplement (doi:10.3390/ijms23063370), 2022-03-21

**Supplementary Figure S1.**

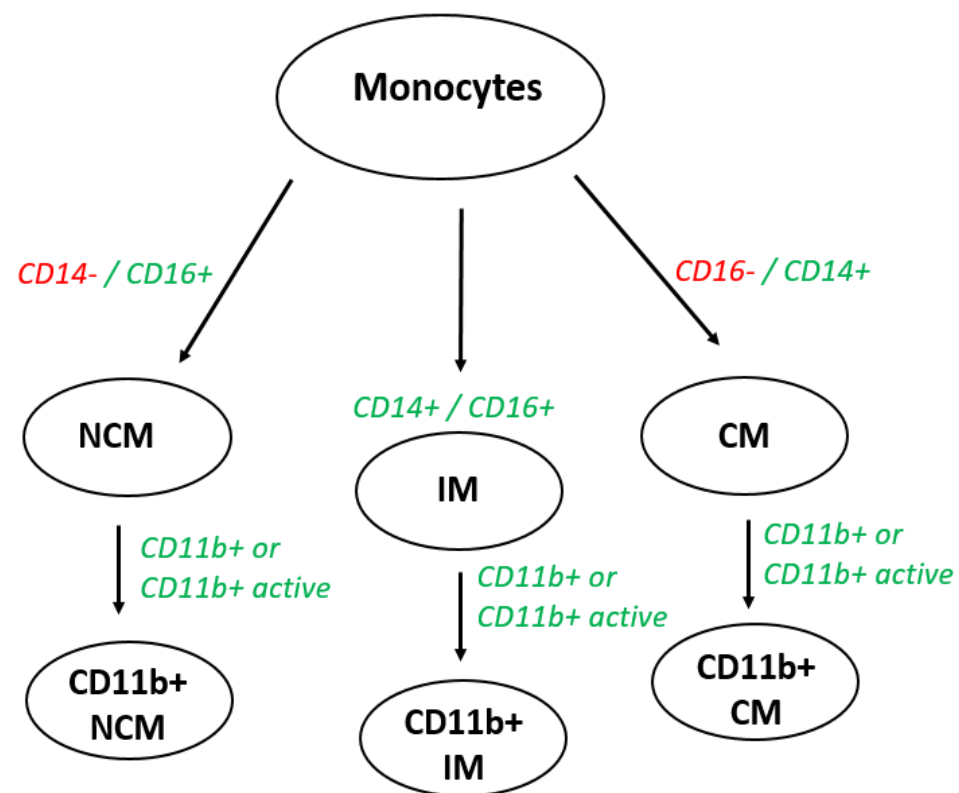

## Supplementary Figure S2.

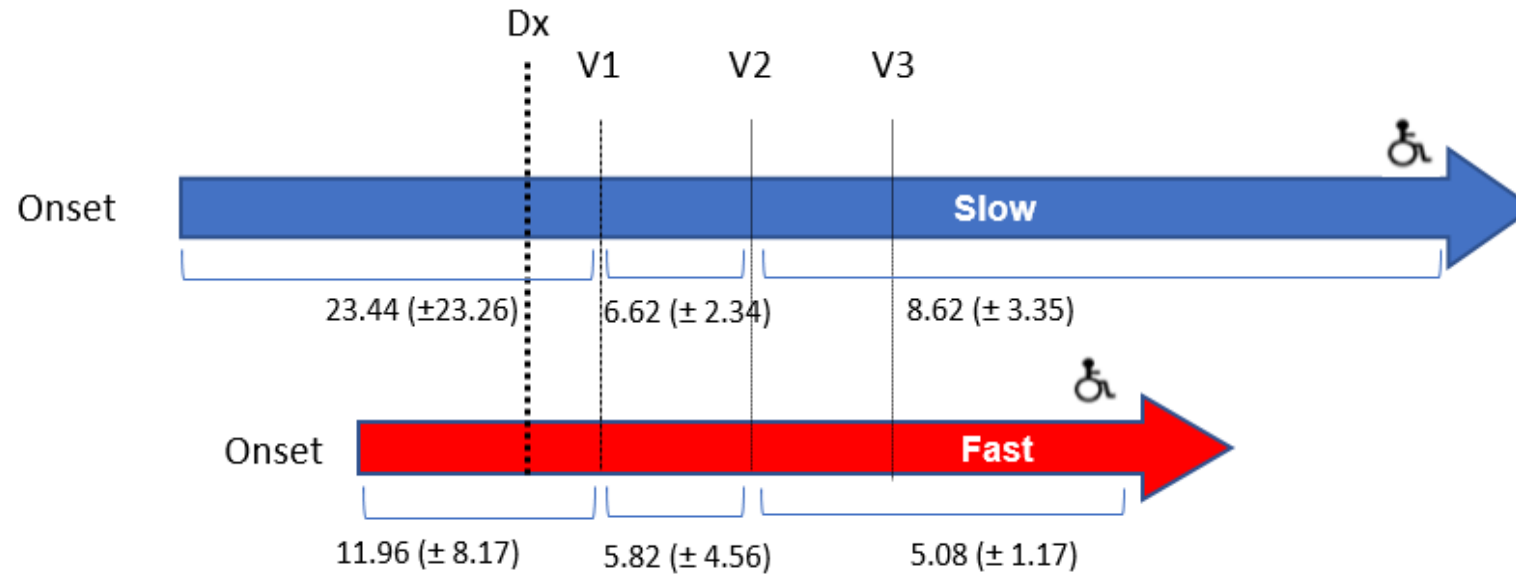

# Supplementary Figure S3.

A.

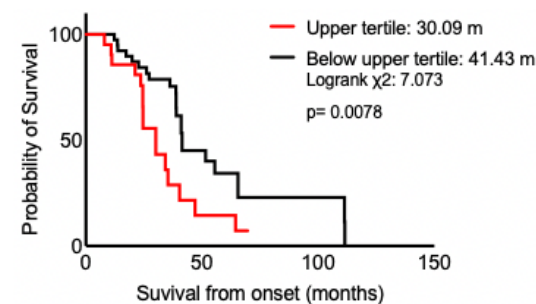

B.

ALS vs HC

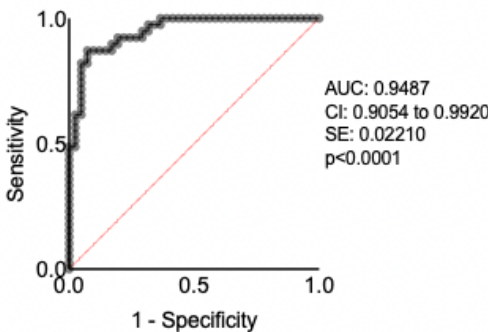

Supplementary Figure S4.

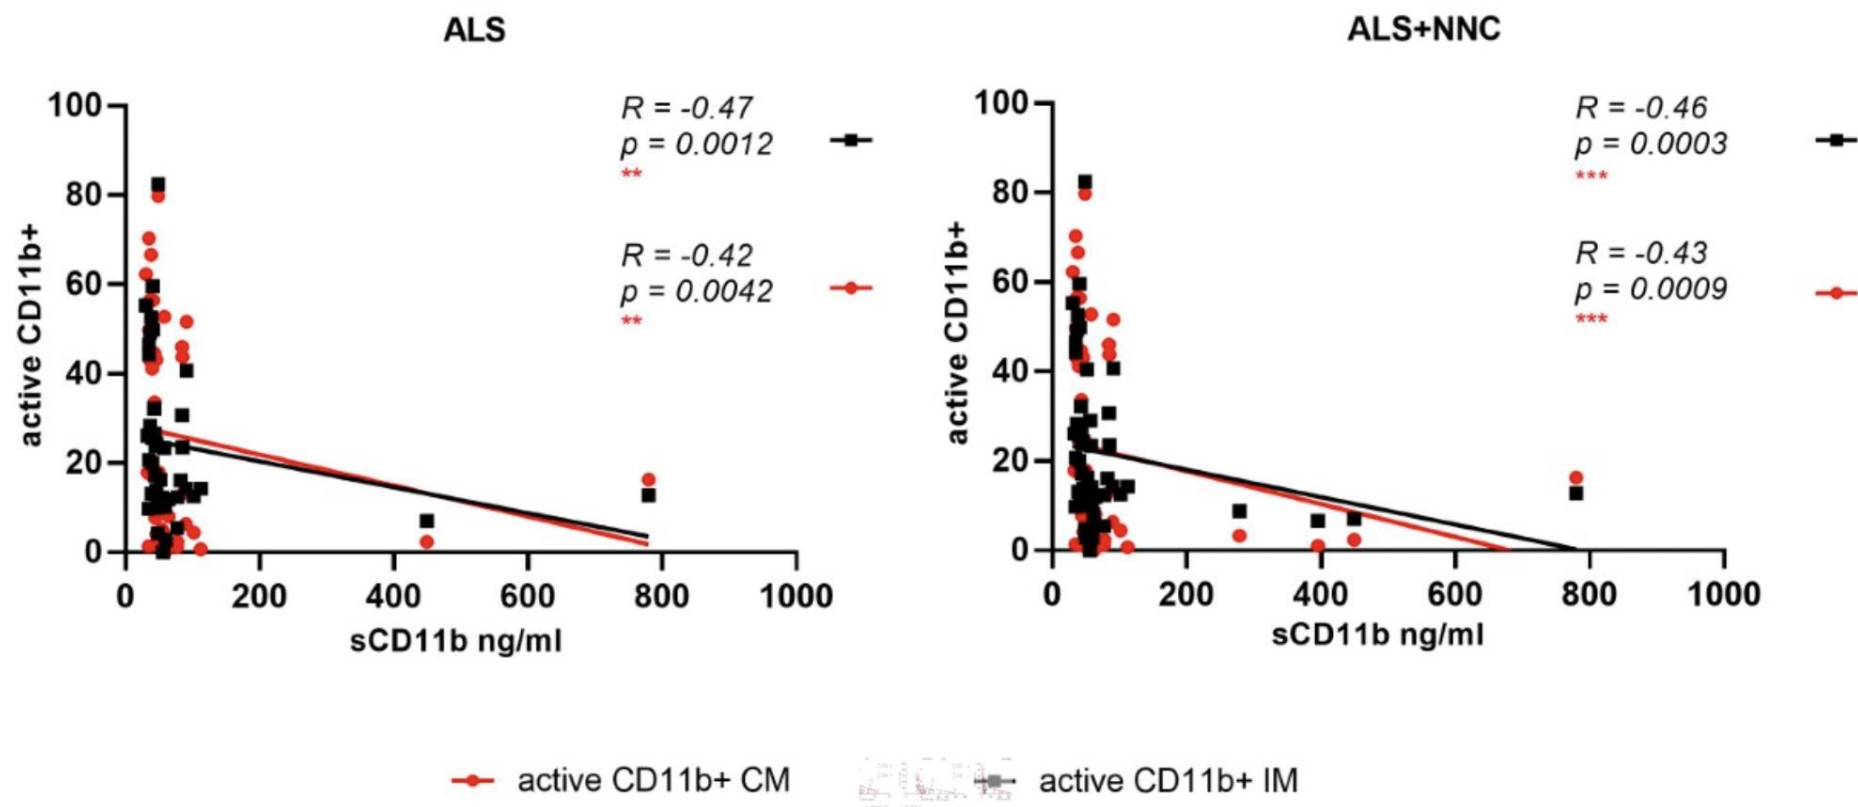

Supplement: s1 [file s1]
